# Supplementary material for: Ameliorative Impact of Liraglutide on Chronic Intermittent Hypoxia-Induced Atrial Remodeling
Source: Hindawi journal article supplement (doi:10.1155/2022/8181474), 2022-04-13
Supplement: f1 [file 8181474.f1.docx]

Supplementary Table 1 Baseline and hematological parameters (n = 8)

|  | Control | Lir | CIH | CIH+Lir |
| --- | --- | --- | --- | --- |
| Body weight (g) |  |  |  |  |
| Before CIH | 25.50±0.36 | 25.67±0.42 | 25.29±0.58 | 25.40±0.38 |
| After CIH | 29.31±0.54 | 26.75±0.37△ | 28.24±0.40 | 25.48±0.32# |
| HW/BW (1/100) | 0.53±0.02 | 0.57±0.01 | 0.57±0.02 | 0.57±0.01 |
| Blood glucose (mmol/L) | 10.33±0.26 | 8.83±0.49 | 10.80±0.34 | 8.28±0.45# |
| HR (bpm/min) | 551±12 | 568±16 | 557±17 | 599±17 |
| SBP (mmHg) | 108.30±2.57 | 95.13±1.88△ | 120.30±3.73* | 106.90±3.66# |
| DBP (mmHg) | 80.25±2.52 | 72.75±1.13△ | 80.88±1.85 | 71.13±1.73# |

Values are given as mean ± SEM. HW/BW, heart weight/body weight; HR, heart rate; SBP, systolic blood pressure; DBP, diastolic blood pressure.

*Significant difference between the Control and CIH groups at *P* < 0.05.

#Significant difference between CIH and CIH+Lir groups at *P* < 0.05.

△Significant difference between the Control and Lir groups at *P* < 0.05.

Supplementary Table 2 Mean option density (MOD) in four groups (n = 6)

| Target proteins | Control | Lir | CIH | CIH+Lir |
| --- | --- | --- | --- | --- |
| PTEN | 0.35±0.02 | 0.34±0.02 | 0.24±0.01* | 0.31±0.01# |
| PI3K | 0.22±0.01 | 0.22±0.01 | 0.32±0.02* | 0.25±0.01# |
| AKT | 0.22±0.02 | 0.20±0.01 | 0.24±0.02 | 0.22±0.02 |
| p-AKT | 0.18±0.01 | 0.18±0.01 | 0.26±0.02* | 0.20±0.01# |

Values are given as mean ± SEM.

*Significant difference between the Control and CIH groups at *P* < 0.05.

#Significant difference between CIH and CIH+Lir groups at *P* < 0.05.
